# Supplementary material for: Saffron extract (Safr'Inside™) improves anxiety related behaviour in a mouse model of low-grade inflammation through the modulation of the microbiota and gut derived metabolites
Source: Royal Society of Chemistry journal article supplement (doi:10.1039/d2fo02739a), 2022-01-01
Supplement: d2fo02739a1.pdf [file d2fo02739a1.pdf]

SUPPLEMENTARY DATA

***Saffron extract (Safr'Inside™) improves anxiety related behaviour in a mouse model of low-grade inflammation through the modulation of the microbiota and gut derived metabolites.***

Matthew Pontifex<sup>1</sup>, Emily Connell<sup>1</sup>, Gwenaelle Le Gall<sup>1</sup>, Line Pourtau<sup>2</sup>, David Gaudout<sup>2</sup>, Cristina Angeloni<sup>3</sup>, Lorenzo Zallocco<sup>4</sup>, Maurizio Ronci<sup>5</sup>, Laura Giusti<sup>6</sup>, Michael Müller<sup>1</sup> and David Vauzour<sup>1\*</sup>

<sup>1</sup> *Norwich Medical School, Faculty of Medicine and Health Sciences, University of East Anglia, Norwich NR4 7TJ, United Kingdom.*

<sup>2</sup> *Activ'Inside, Beychac et Caillau, France*

<sup>3</sup> *Department for Life Quality Studies, Alma Mater Studiorum, University of Bologna, Corso d'Augusto 237, 47921 Rimini (RN), Italy*

<sup>4</sup> *Department of Pharmacy, University of Pisa, 56126 Pisa (PI), Italy*

<sup>5</sup> *Department of Pharmacy, University G. d'Annunzio of Chieti-Pescara, Chieti, Italy.*

<sup>6</sup> *School of Pharmacy, University of Camerino, Via Gentile III da Varano, 62032 Camerino (MC), Italy*

\* To whom correspondence should be addressed: Dr David Vauzour; Email: [D.Vauzour@uea.ac.uk](mailto:D.Vauzour@uea.ac.uk)

SUPPLEMENTARY DATA

**Table S1:** Full dietary composition

| Diet                     | D10012M<br>AIN-93M |        | D21011503<br>(44mg Safr'Inside™) |        |
|--------------------------|--------------------|--------|----------------------------------|--------|
|                          | gm %               | Kcal % | gm %                             | Kcal % |
| Protein                  | 14                 | 15     | 14                               | 15     |
| Carbohydrate             | 73                 | 76     | 73                               | 76     |
| Fat                      | 4                  | 9      | 4                                | 9      |
| Total                    |                    | 100    |                                  | 100    |
| Kcal/gm                  | 3.8                |        | 3.8                              |        |
|                          |                    |        |                                  |        |
| <b>Dietary component</b> | gm                 | Kcal   | gm                               | Kcal   |
| Casein                   | 140                | 560    | 140                              | 560    |
| L-Cystine                | 1.8                | 7.2    | 1.8                              | 7.2    |
| Corn starch              | 495.692            | 1983   | 495.692                          | 1983   |
| Maltodextrin 10          | 125                | 500    | 125                              | 500    |
| Sucrose                  | 100                | 400    | 100                              | 400    |
| Cellulose BW200          | 50                 | 0      | 50                               | 0      |
| Soybean Oil              | 40                 | 360    | 40                               | 360    |
| t-Butylhydroquinone      | 0.008              | 0      | 0.008                            | 0      |
| Mineral mix S10022M      | 35                 | 0      | 35                               | 0      |
| Vitamin mix V10037       | 10                 | 40     | 10                               | 40     |
| Choline Bitartrate       | 2.5                | 0      | 2.5                              | 0      |
| Safr'Inside™             | 0                  | 0      | 0.044                            | 0      |
| FD&C Blue Dye #1         | 0                  | 0      | 0.05                             | 0      |
| Total                    | 1000               | 3850   | 1000.094                         | 3850   |

SUPPLEMENTARY DATA

**Table S2:** Bacterial abundance across treatment groups.

|                                      | Sham         | LPS         | LPS SAFF    | P value  | FDR      |
|--------------------------------------|--------------|-------------|-------------|----------|----------|
| <b>Phylum</b>                        |              |             |             |          |          |
| Bacteroidota                         | 2096 ± 311   | 829 ± 99.5  | 2170 ± 345  | 0.003379 | 0.024421 |
| Firmicutes                           | 48667 ± 1164 | 54004 ± 492 | 50608 ± 607 | 0.005427 | 0.024421 |
| Verrucomicrobiota                    | 1063 ± 450   | 117 ± 31.4  | 2259 ± 676  | 0.011951 | 0.035854 |
| Actinobacteriota                     | 3648 ± 1150  | 1001 ± 343  | 875 ± 165   | 0.019305 | 0.043437 |
| <b>Family</b>                        |              |             |             |          |          |
| Rhizobiaceae                         | 17 ± 3.48    | 31 ± 3.24   | 2 ± 1.12    | 0.001446 | 0.031211 |
| Rikenellaceae                        | 430 ± 38.5   | 150 ± 18.0  | 365 ± 133   | 0.004171 | 0.031211 |
| Clostridia_UCG_014                   | 60 ± 5.06    | 68 ± 10.8   | 217 ± 39.6  | 0.004479 | 0.031211 |
| Anaerovoracaceae                     | 23 ± 4.65    | 28 ± 5.74   | 69 ± 5.92   | 0.005061 | 0.031211 |
| Prevotellaceae                       | 55 ± 13.7    | 12 ± 3.07   | 125 ± 17.2  | 0.005061 | 0.031211 |
| Muribaculaceae                       | 1403 ± 276   | 552 ± 93.3  | 1456 ± 192  | 0.005959 | 0.031499 |
| Christensenellaceae                  | 2 ± 0.80     | 1 ± 0.55    | 13 ± 2.57   | 0.010253 | 0.04422  |
| Akkermansiaceae                      | 1063 ± 450   | 117 ± 31.4  | 2259 ± 676  | 0.011951 | 0.04422  |
| <b>Genus</b>                         |              |             |             |          |          |
| <i>Christensenellaceae_R_7_group</i> | 0 ± 0.00     | 0 ± 0.00    | 7 ± 1.54    | 0.001097 | 0.034042 |
| <i>Anaerostipes</i>                  | 0 ± 0.00     | 0 ± 0.00    | 120 ± 47.6  | 0.001796 | 0.034042 |
| <i>Ruminococcus</i>                  | 0 ± 0.00     | 0 ± 0.00    | 43 ± 15.7   | 0.001796 | 0.034042 |
| <i>Eubacterium_nodatum_group</i>     | 2 ± 0.91     | 5 ± 1.65    | 20 ± 3.16   | 0.003241 | 0.034042 |
| <i>Family_XIII_UCG_001</i>           | 3 ± 0.76     | 6 ± 1.29    | 13 ± 2.56   | 0.003651 | 0.034042 |

SUPPLEMENTARY DATA

|                                    |            |            |            |          |          |
|------------------------------------|------------|------------|------------|----------|----------|
| <i>Rikenella</i>                   | 27 ± 7.51  | 16 ± 7.54  | 0 ± 0.00   | 0.003919 | 0.034042 |
| <i>Clostridia_UCG_014</i>          | 60 ± 5.06  | 68 ± 10.8  | 217 ± 39.6 | 0.004479 | 0.034042 |
| <i>Coriobacteriaceae_UCG_002</i>   | 161 ± 43.7 | 103 ± 19.4 | 2 ± 1.02   | 0.004705 | 0.034042 |
| <i>Muribaculum</i>                 | 40 ± 9.04  | 6 ± 1.52   | 23 ± 5.92  | 0.004838 | 0.034042 |
| <i>Alloprevotella</i>              | 55 ± 13.7  | 12 ± 3.1   | 125 ± 17.2 | 0.005061 | 0.034042 |
| <i>Rikenellaceae_RC9_gut_group</i> | 27 ± 7.51  | 16 ± 7.54  | 0 ± 0.00   | 0.007149 | 0.041107 |
| <i>Eubacterium_brachy_group</i>    | 191 ± 35.7 | 47 ± 8.93  | 127 ± 58.5 | 0.01109  | 0.046275 |
| <i>Negativibacillus</i>            | 0 ± 0.00   | 1 ± 0.3    | 3 ± 1.28   | 0.011323 | 0.046275 |
| <i>Anaeroplasma</i>                | 21 ± 8.99  | 8 ± 2.77   | 0 ± 0.00   | 0.011426 | 0.046275 |
| A2                                 | 79 ± 41.3  | 326 ± 52.7 | 197 ± 42.0 | 0.011897 | 0.046275 |
| <i>Akkermansia</i>                 | 1063 ± 450 | 117 ± 31.4 | 2259 ± 676 | 0.011951 | 0.046275 |
| <i>Staphylococcus</i>              | 3 ± 0.93   | 9 ± 1.30   | 4 ± 1.32   | 0.012921 | 0.046275 |
| <i>Lactococcus</i>                 | 39 ± 10.4  | 123 ± 24.6 | 53 ± 6.55  | 0.013124 | 0.046275 |
| <i>Desulfovibrio</i>               | 597 ± 533  | 42 ± 6.68  | 9 ± 2.43   | 0.013413 | 0.046275 |

SUPPLEMENTARY DATA

**Table S3:** Full statistical analysis of metabolomic data

| <b>Metabolite</b>            | <b>f.value</b> | <b>p.value</b> | <b>FDR</b> | <b>Fisher's LSD</b>                         |
|------------------------------|----------------|----------------|------------|---------------------------------------------|
| Urocanate                    | 16.164         | 0.0003         | 0.016      | LPS - LPS SAFF; Sham - LPS; Sham - LPS SAFF |
| Cytidine                     | 15.657         | 0.0003         | 0.016      | LPS SAFF - LPS; LPS - Sham; LPS SAFF - Sham |
| Putrescine                   | 11             | 0.0016         | 0.044      | LPS - Sham; LPS SAFF - Sham                 |
| Valine                       | 10.487         | 0.0019         | 0.044      | LPS SAFF - LPS; Sham - LPS; Sham - LPS SAFF |
| Histidine                    | 9.1322         | 0.0033         | 0.050      | Sham - LPS; Sham - LPS SAFF                 |
| Ornithine                    | 9.0624         | 0.0034         | 0.050      | LPS SAFF - LPS; Sham - LPS                  |
| Guanosine                    | 8.7775         | 0.0039         | 0.050      | LPS SAFF - LPS; LPS SAFF - Sham             |
| Alanine                      | 7.802          | 0.0059         | 0.063      | Sham - LPS; Sham - LPS SAFF                 |
| Guanosine phosphate derivate | 7.6816         | 0.0063         | 0.063      | LPS - Sham; LPS SAFF - Sham                 |
| Dimethylamine                | 6.5439         | 0.0108         | 0.097      | LPS - LPS SAFF; Sham - LPS SAFF             |
| Leucine                      | 6.244          | 0.0126         | 0.098      | LPS SAFF - LPS; Sham - LPS                  |
| Threonine                    | 6.1647         | 0.0131         | 0.098      | LPS SAFF - LPS; Sham - LPS                  |

SUPPLEMENTARY DATA

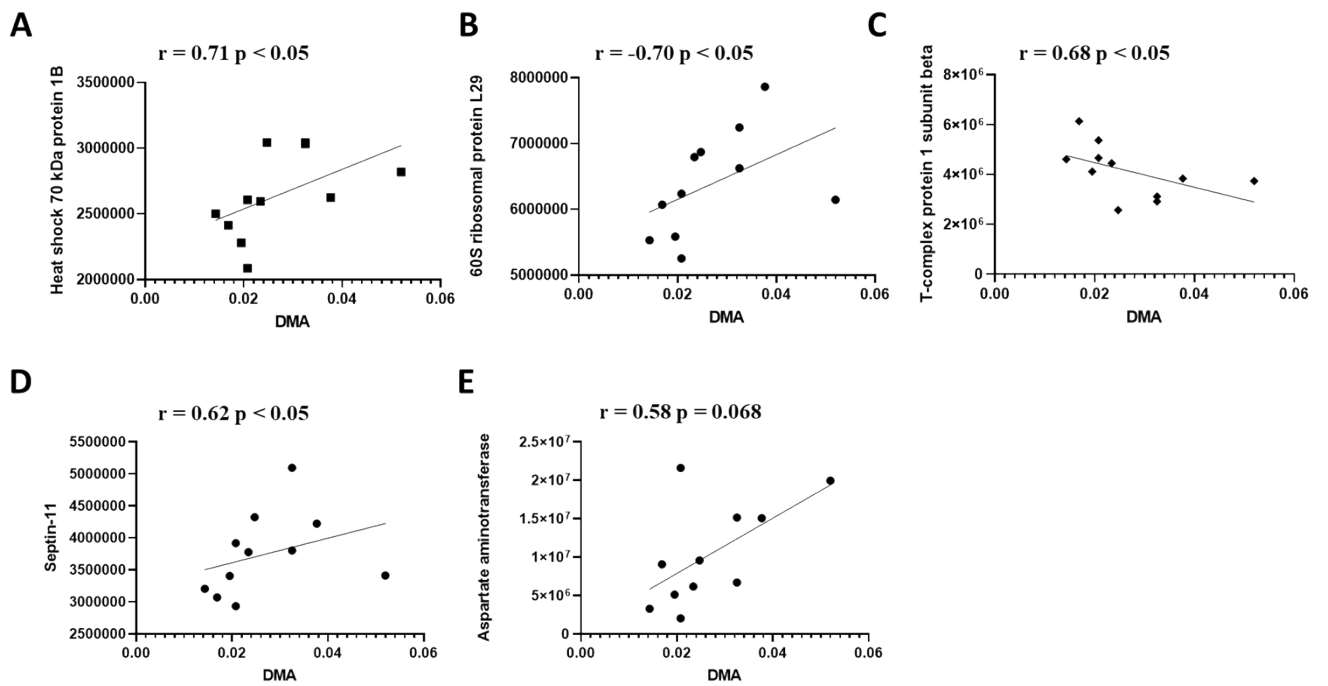

Figure S1: DMA correlates with several significantly modulated proteins
